# Supplementary material for: A novel ruthenium(ii)–cobaloxime supramolecular complex for photocatalytic H2 evolution: synthesis, characterisation and mechanistic studies
Source: Royal Society of Chemistry journal article supplement (doi:10.1039/c2dt30309d), 2012-01-01

Figure S1. ESI MS for  $[\text{Co}(\text{dmgBF}_2)_2(\text{H}_2\text{O})_2]$ .  
Low resolution

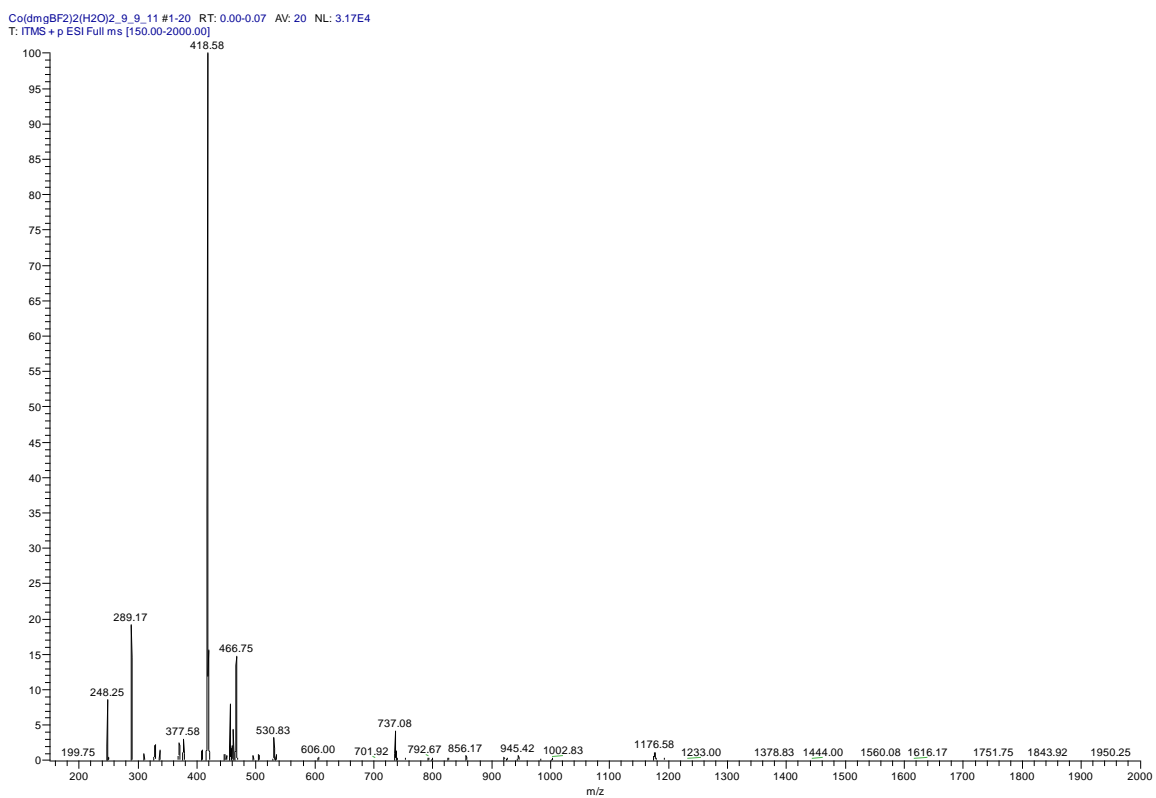

Figure S2. ESI MS for compound **4**.  
Low resolution

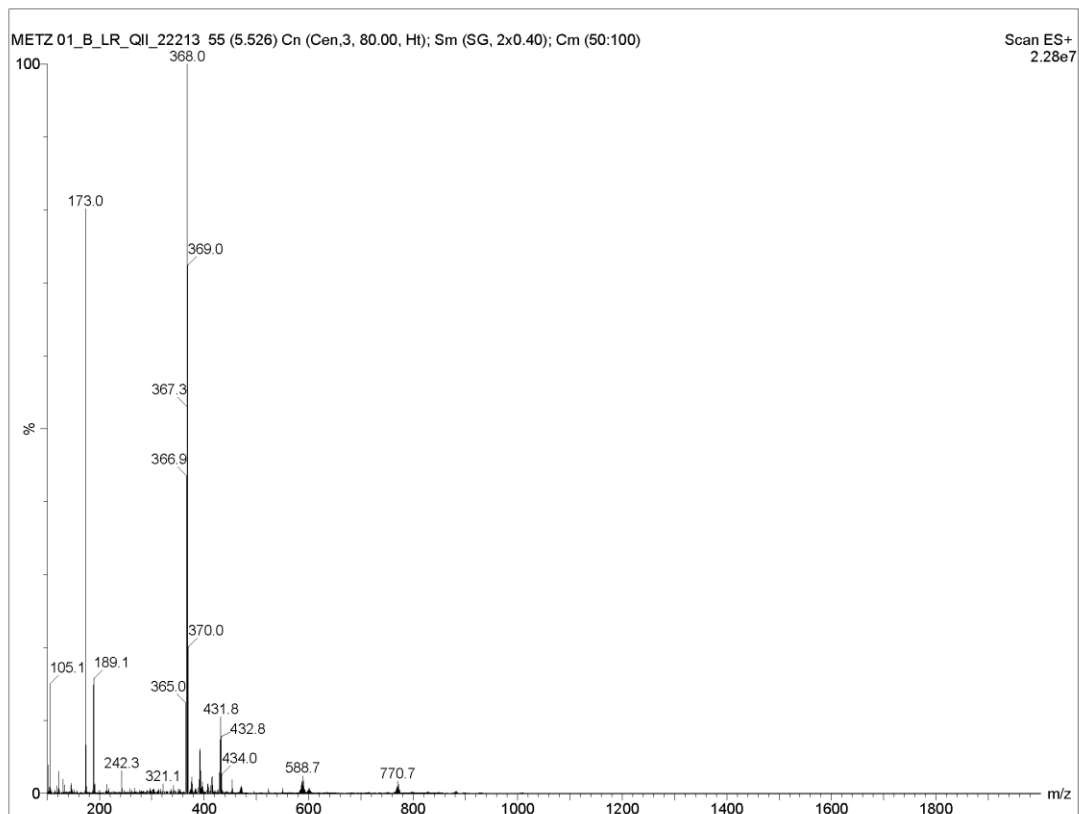

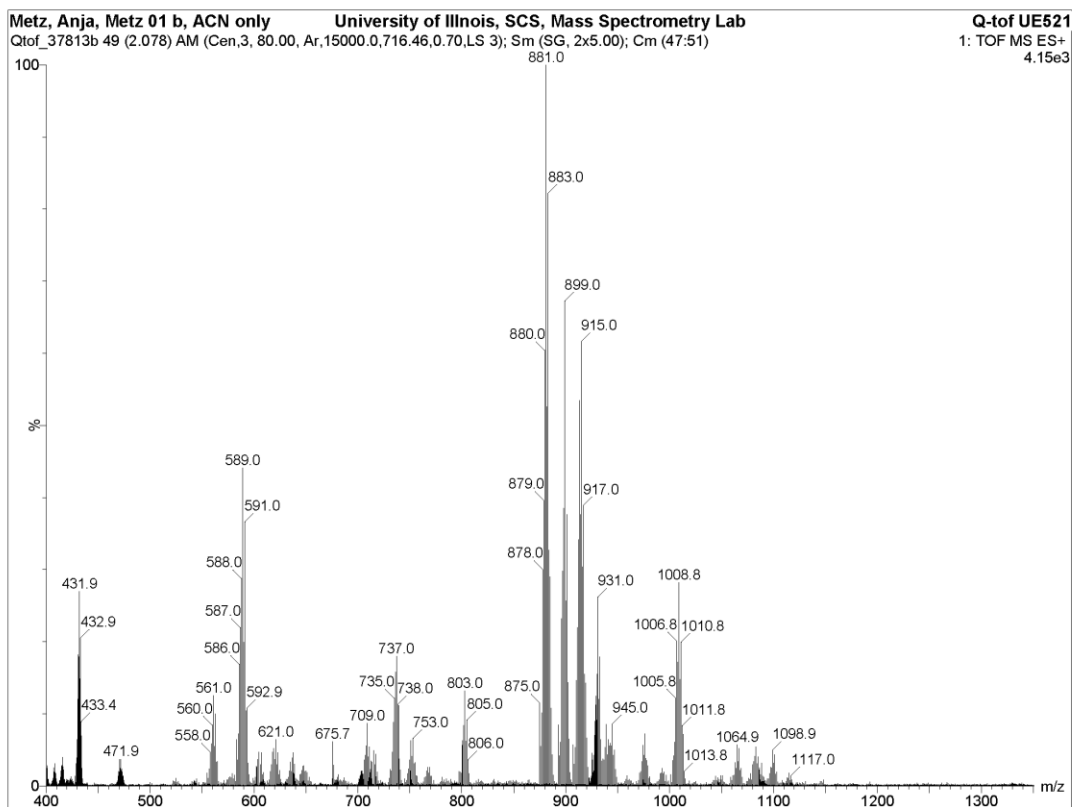

## High Resolution

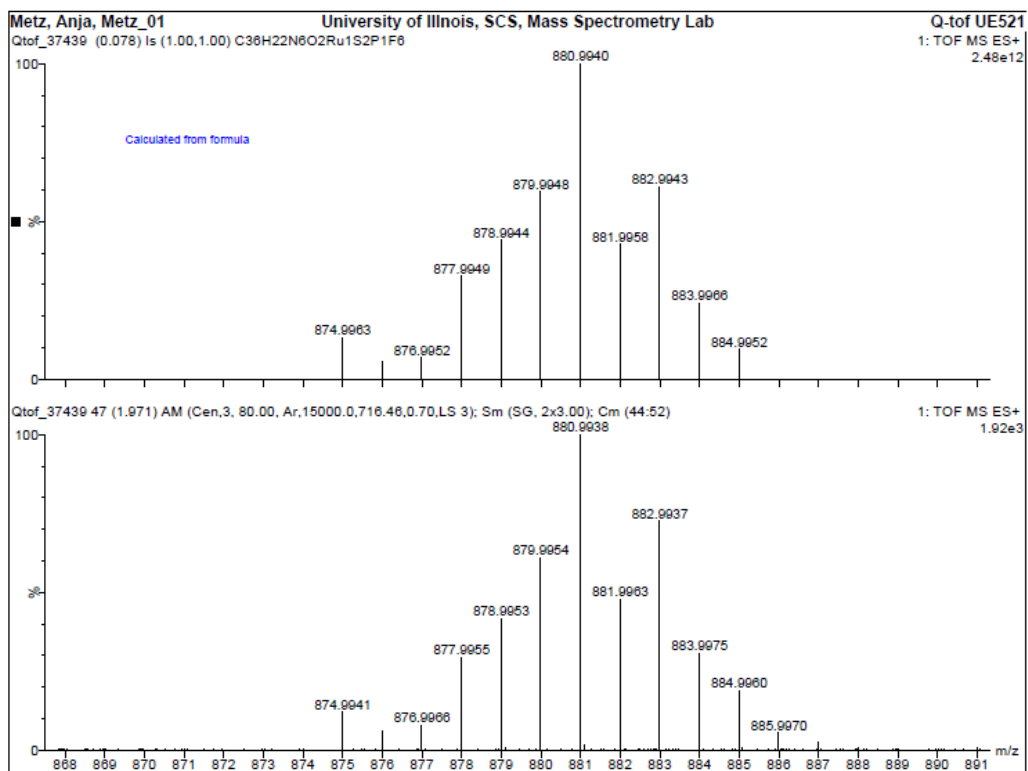

Figure S3. ESI MS for compound **5**.  
Low resolution

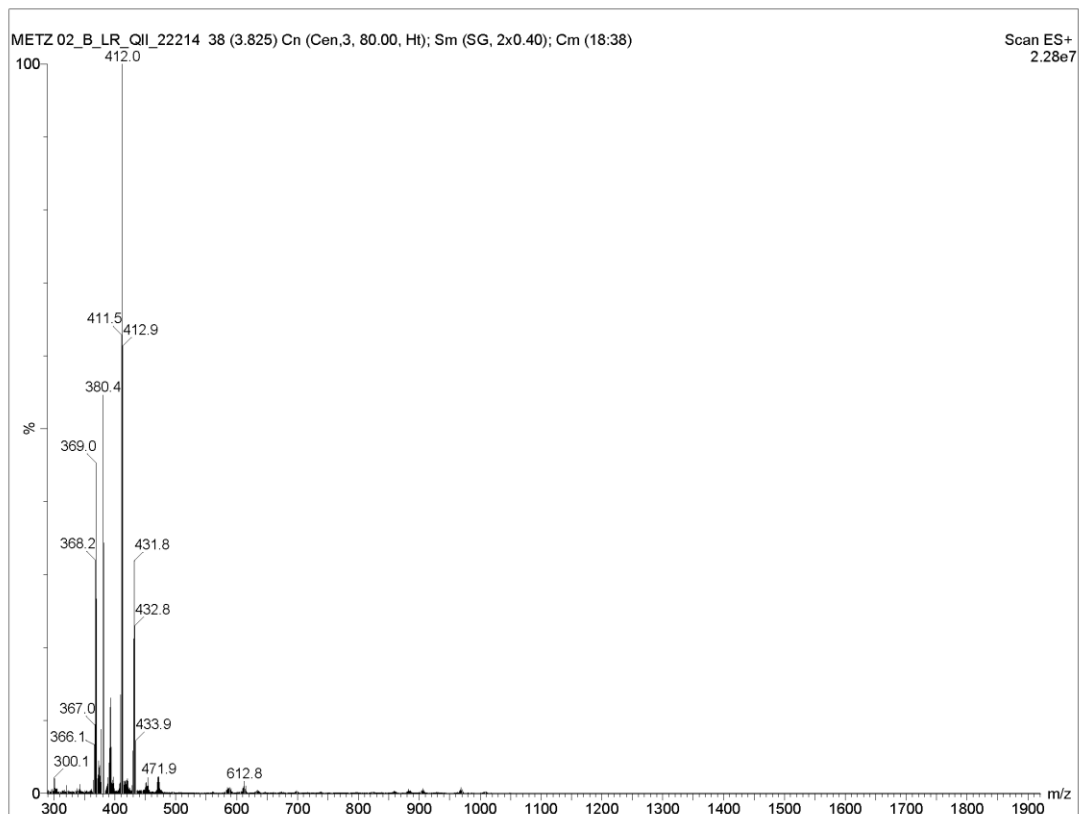

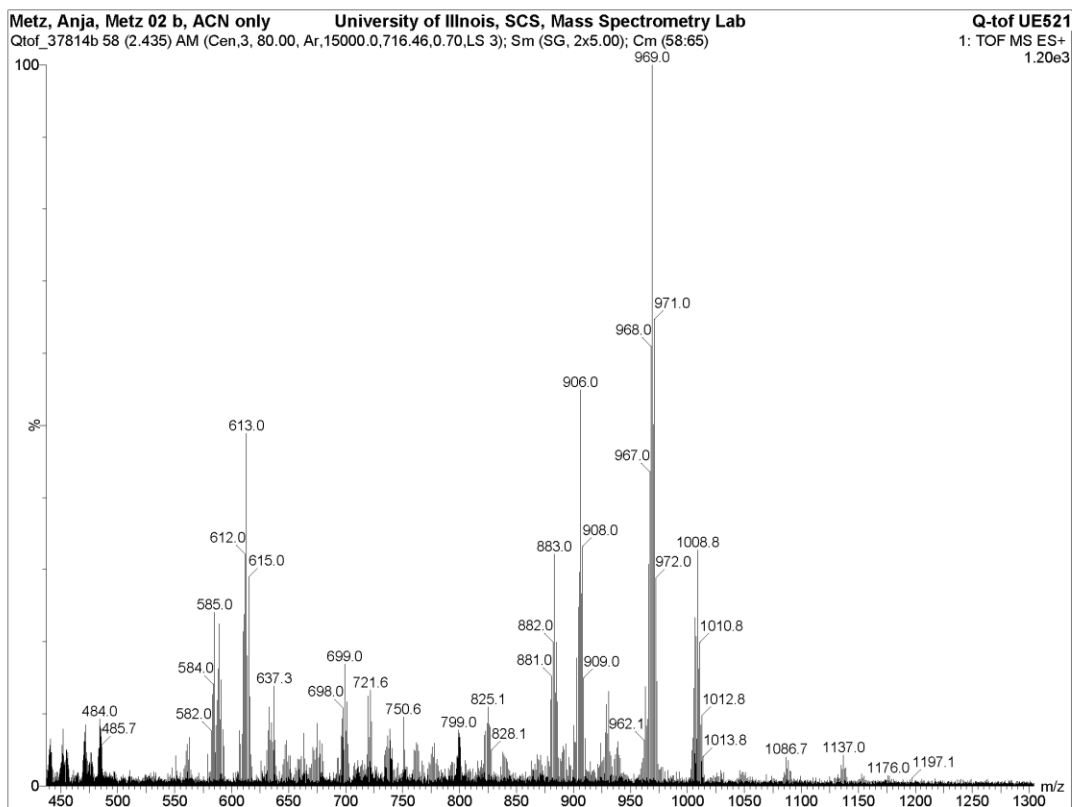

### High resolution

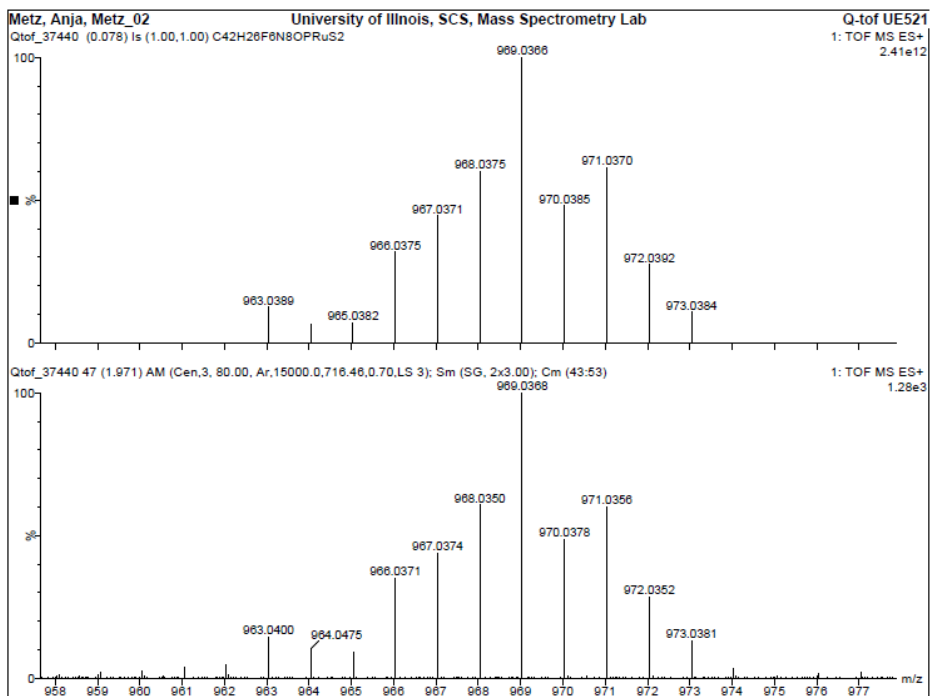

Figure S4. ESI MS for compound **6**.

Low resolution

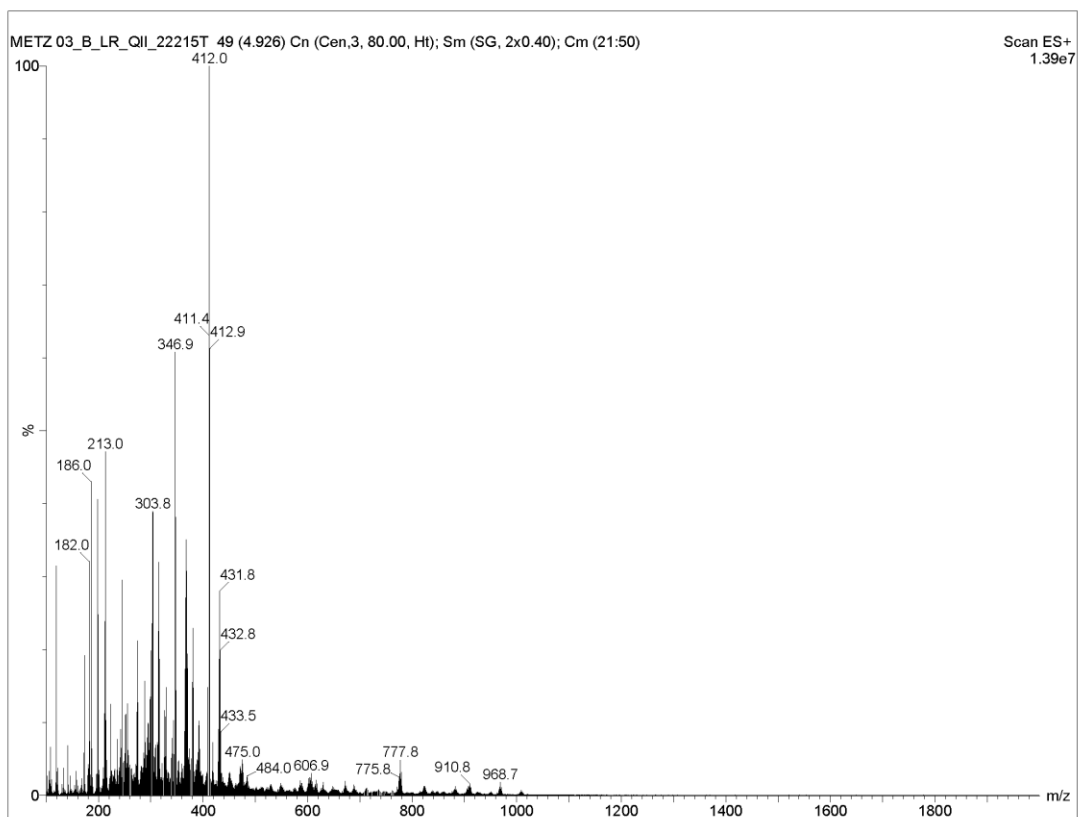

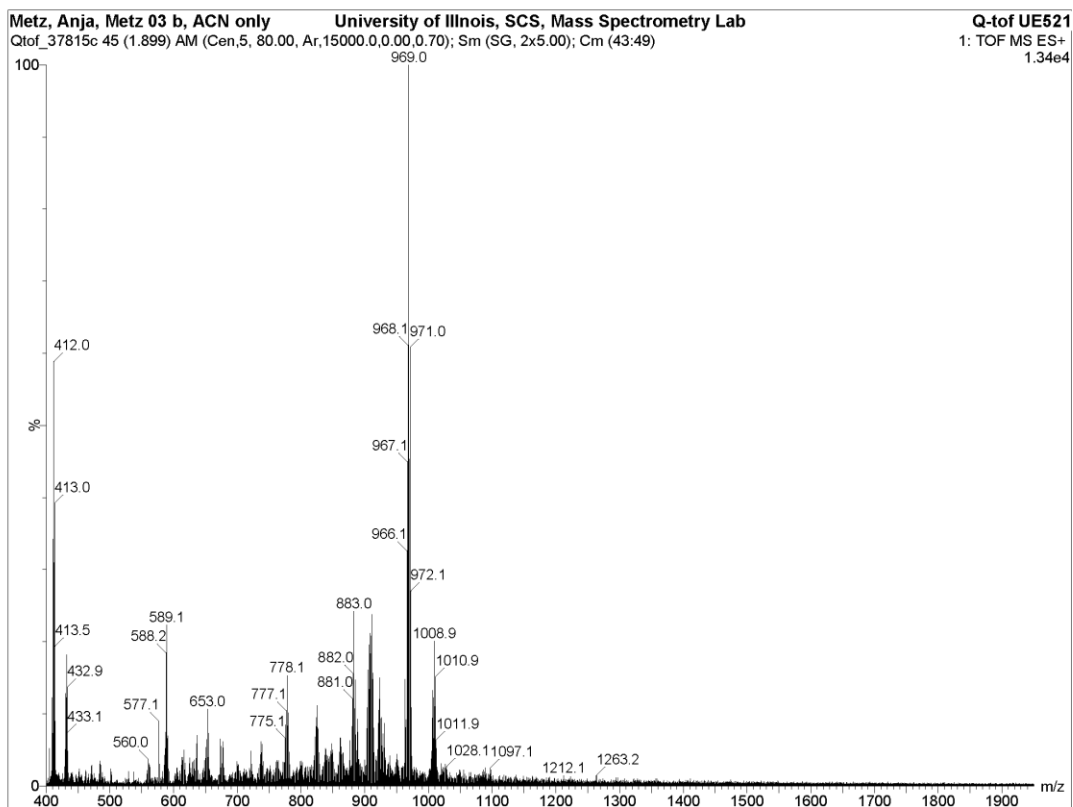



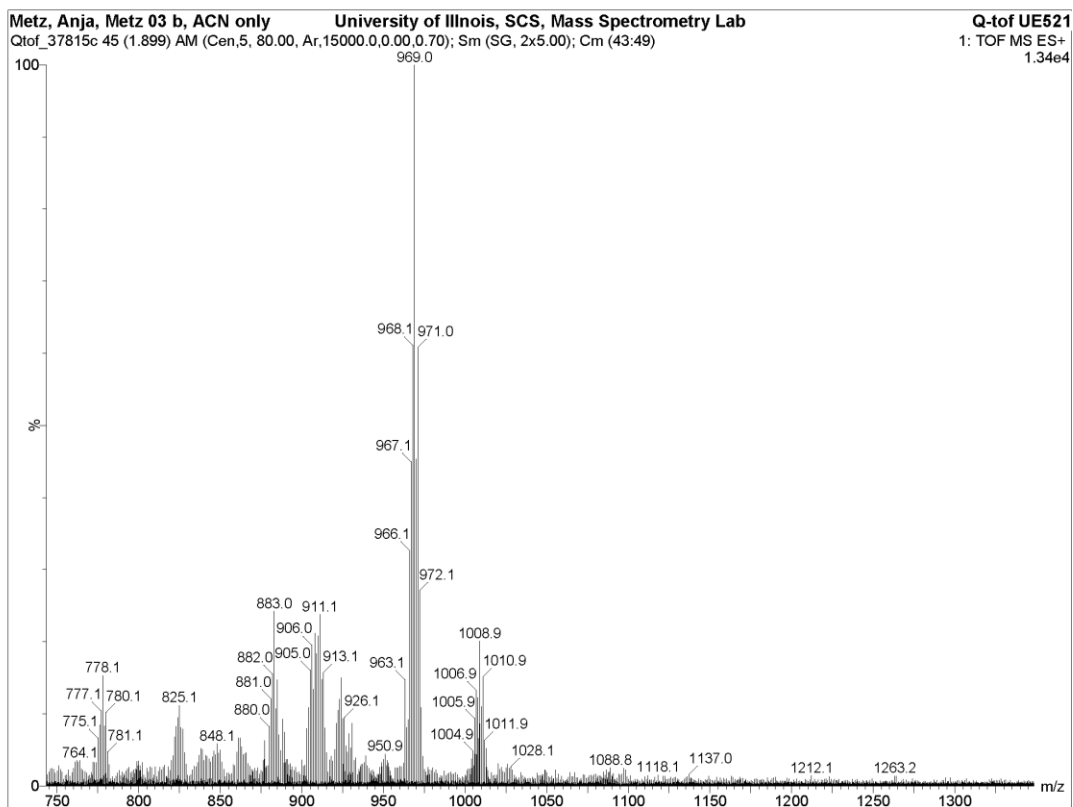

Figure S5. FT IR spectrum of  $[\text{Co}(\text{dmgBF}_2)_2(\text{H}_2\text{O})_2]$ .

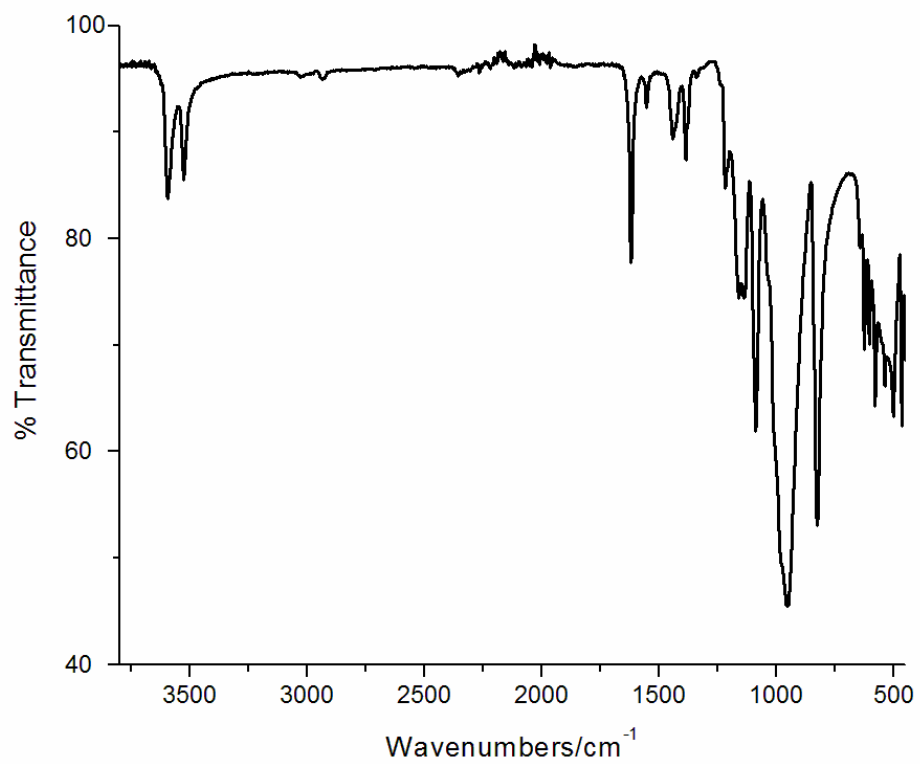

Figure S6. FT IR spectrum of compound 4.

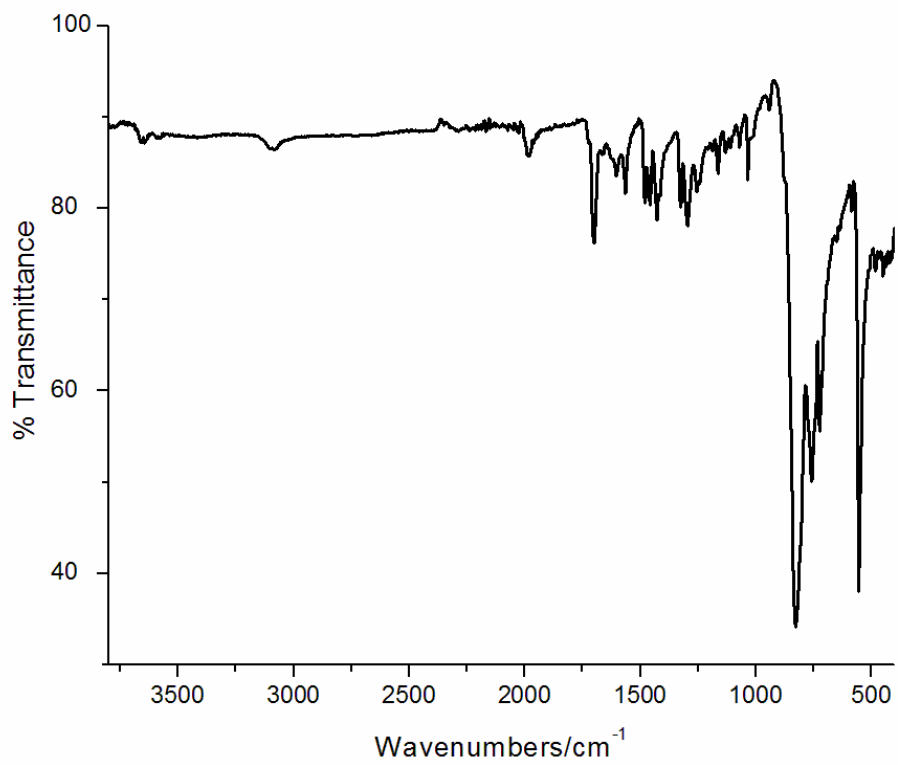

Figure S7. FT IR spectrum of compound **5**.

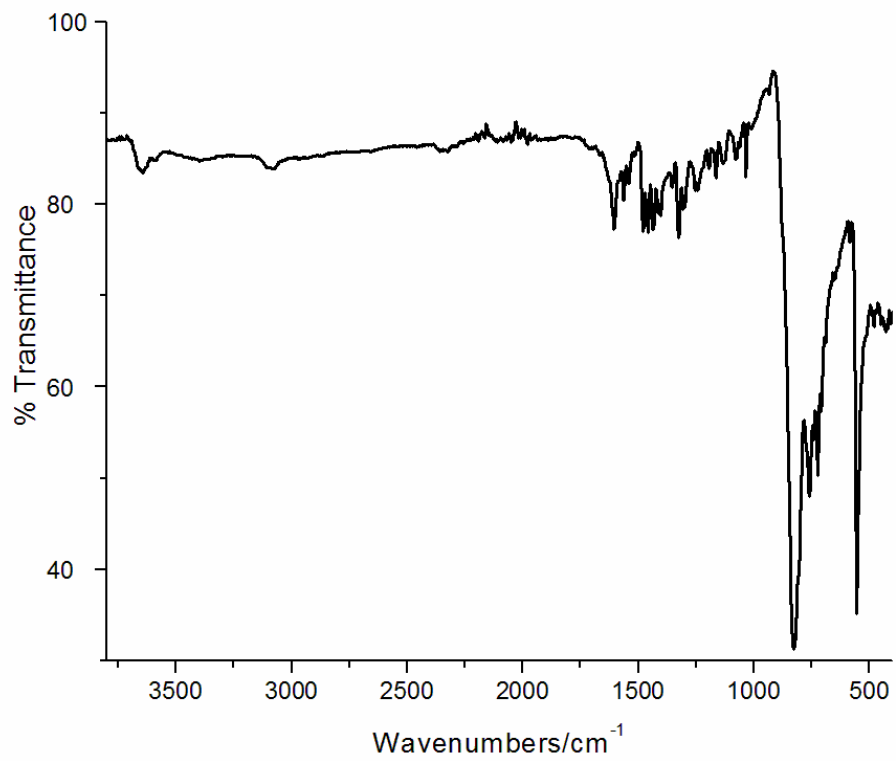

Figure S8. FT IR spectrum of compound **6**.

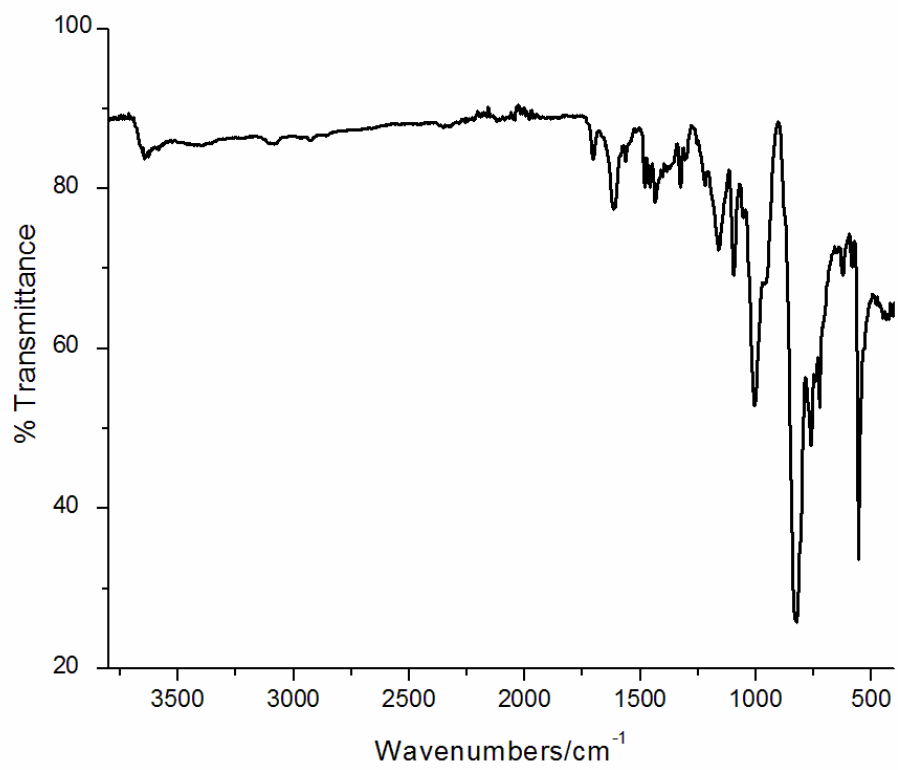

Figure S9. UV-visible spectra of dilute solutions of  $[\text{Co}(\text{dmgBF}_2)_2(\text{H}_2\text{O})_2]$ , compounds **4**, **5**, and **6** in  $\text{CH}_3\text{CN}$ .

(A)  $[\text{Co}(\text{dmgBF}_2)_2(\text{H}_2\text{O})_2]$

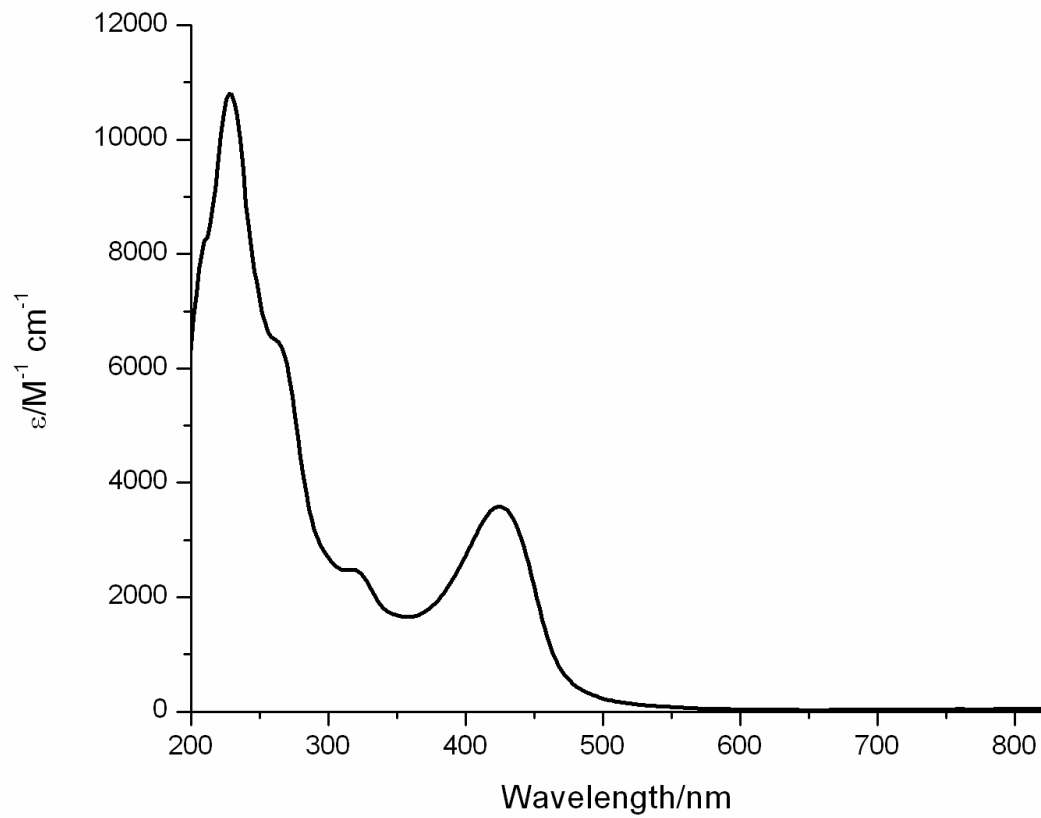

(B) Compounds 4, 5, and 6.

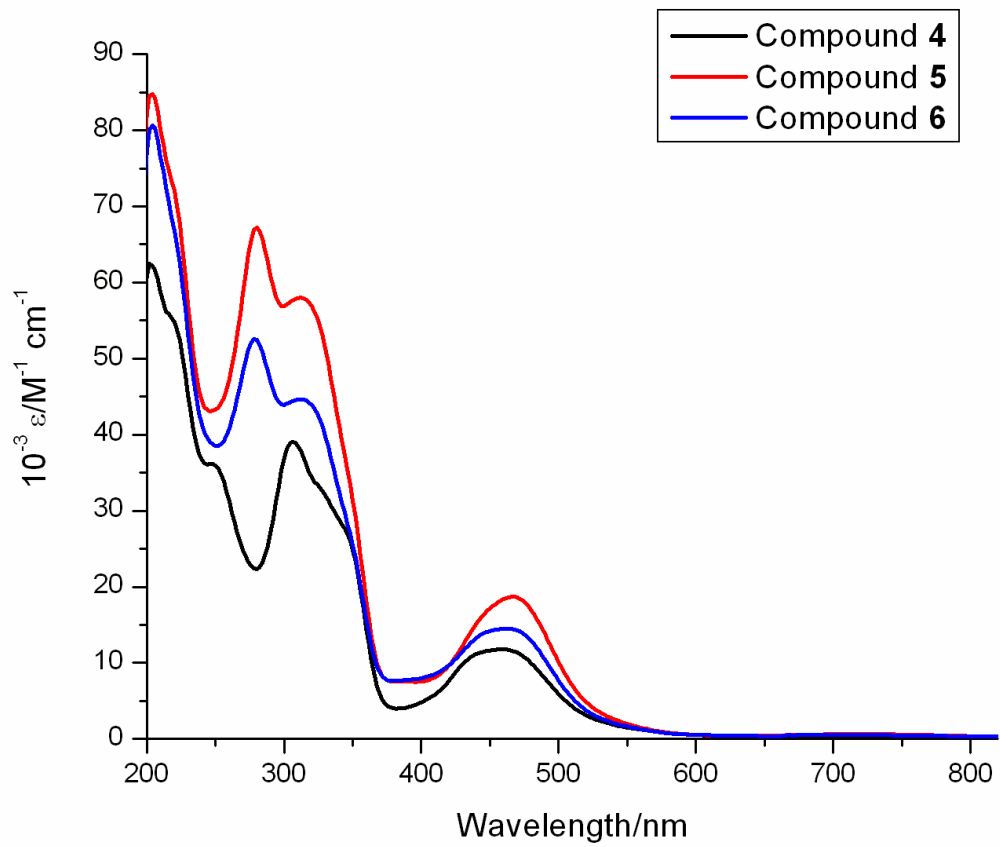

Figure S10. Q-band ESR spectra simulations of  $[\text{Co}(\text{dmgBF}_2)_2(\text{OH}_2)_2]$  and compound **6** in DMSO at 100 K. Instrument settings were as follows: centre field = 11.5 kG, sweep width = 3500.00 G, microwave frequency = 34.06 GHz, microwave power = 2.00 mW, modulation frequency = 100 kHz, and modulation amplitude = 10.0 G.

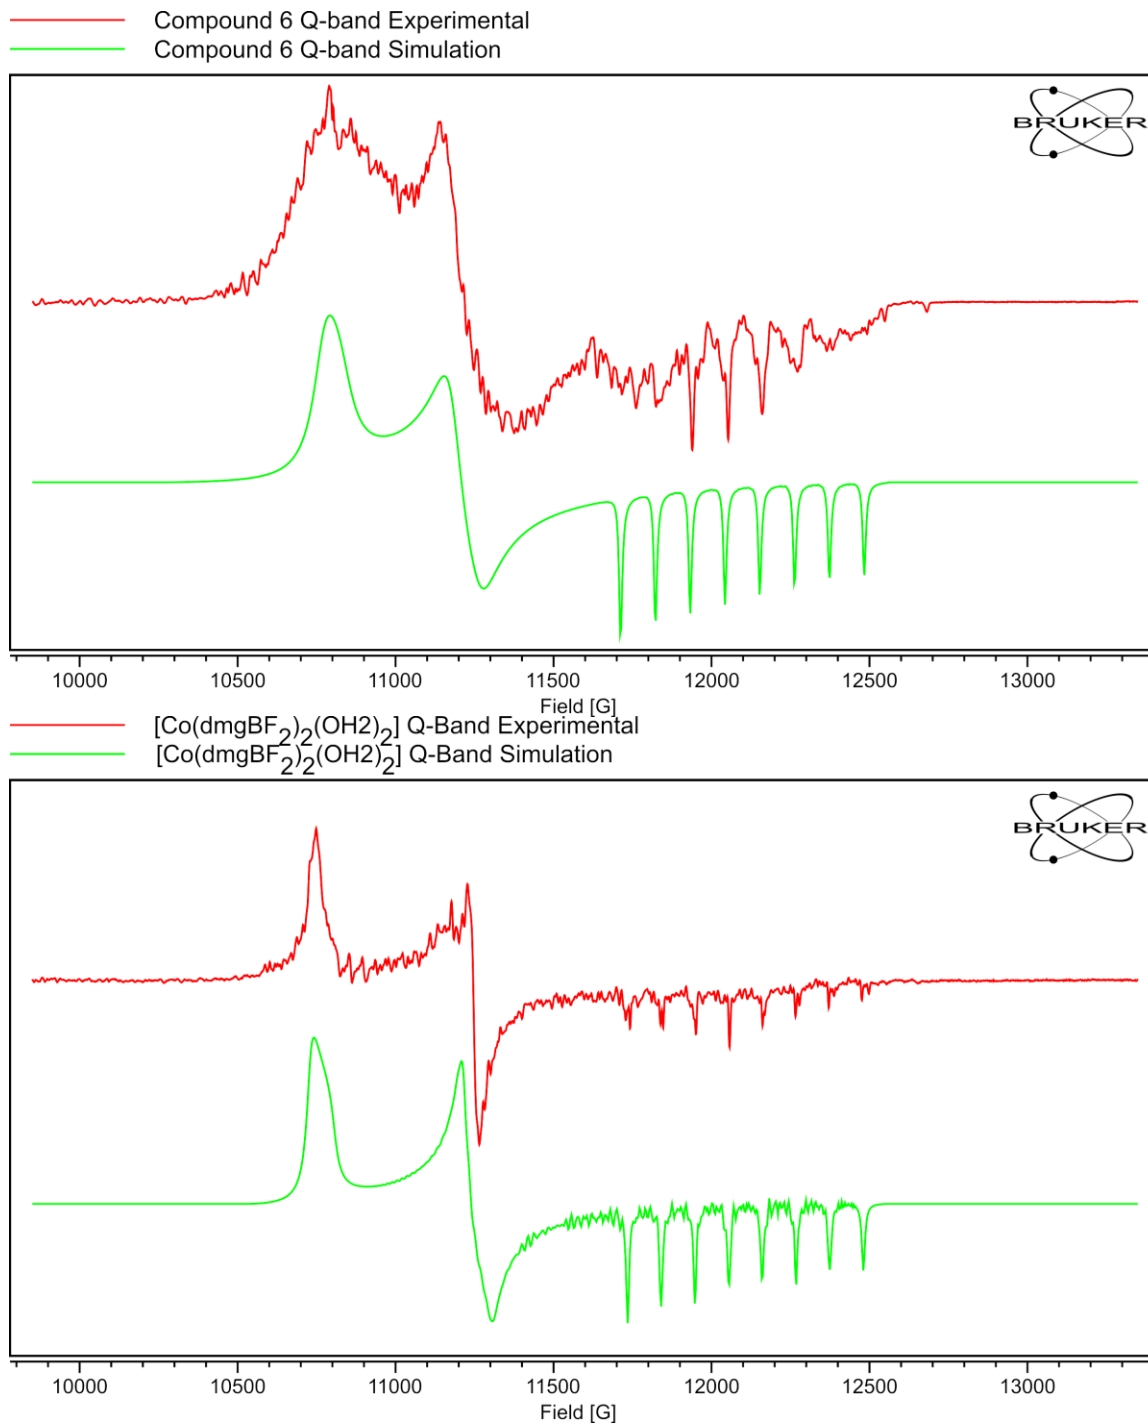



Figure S11. An X-band ESR spectrum and simulation of compound **8** in DMSO at 101 K. Instrument settings were as follows: centre field = 3200.00 G, sweep width = 1500.00 G, static field = 2450 G, microwave frequency = 9.46 GHz, microwave power = 0.22 mW, receiver gain =  $5.02 \times 10^4$ , modulation frequency = 100 kHz, modulation amplitude = 2.00 G, modulation phase =  $0^\circ$ , time constant = 40.96 ms, conversion time = 40.00 ms, and sweep time = 96.00 s.

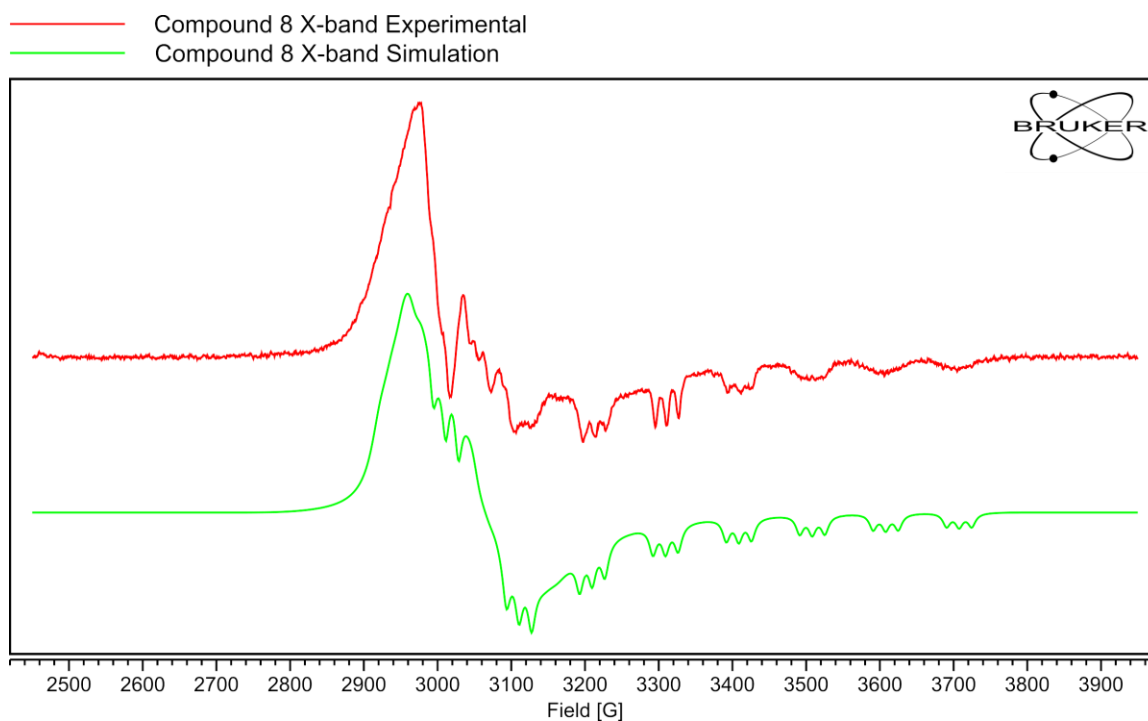

Supplement: c2dt30309d.pdf [file c2dt30309d.pdf]
